# Supplementary material for: Excitonic coupling interactions in the self-assembly of perylene-bridged bis(β-cyclodextrin)s and porphyrin
Source: Royal Society of Chemistry journal article supplement (doi:10.1039/c2cc17786b), 2012-01-01
Supplement: c2cc17786b.pdf [file c2cc17786b.pdf]

## Supporting Information

for

### Excitonic Coupling Interactions in the Self-Assembly of Perylene-Bridged Bis( $\beta$ -cyclodextrin)s and Porphyrin

Ke-Rang Wang,<sup>[a,b]</sup> Dong-Sheng Guo,<sup>[a]</sup> Bang-Ping Jiang,<sup>[a]</sup> Yu Liu\*<sup>[a]</sup>

[a] Department of Chemistry, State Key Laboratory of Elemento-Organic Chemistry,  
Nankai University, Tianjin 300071, P. R. China

[b] College of Chemistry and Environmental Science, Hebei University, Baoding  
071002, P. R. China

E-mail: yuliu@nankai.edu.cn Fax:(+86)22-2350-3625

## Experiment Section

**Materials.** The synthesis and the characteristic data of compound **1** were reported in our previous paper.<sup>1</sup> Compound **2** was obtained from 5,10,15,20-Tetrakis(4-sulfonatophenyl)porphyrin (purchased from Sigma–Aldrich) reacting with zinc oxide by the reported methods.<sup>2</sup>

**Measurements.** 2D NOESY spectrum was recorded on a Varian 300 Spectrometer. UV–Vis spectra were recorded in a conventional quartz cell (light path 10 mm) on a Shimadzu UV-3600 spectrophotometer equipped with a PTC-348WI temperature controller to keep the temperature at 25 °C. The fluorescence spectra were recorded in a conventional quartz cell on a VARIAN CARY Eclipse equipped with a VARIAN CARY single cell peltier accessory to keep the temperature at 25 °C. Circular dichroism spectra were performed on J-715-150S (JASCO). The dynamic light scattering (DLS) was performed on a laser light scattering spectrometer (BI-200SM) equipped with a digital correlator (BI-9000AT) at 636 nm.

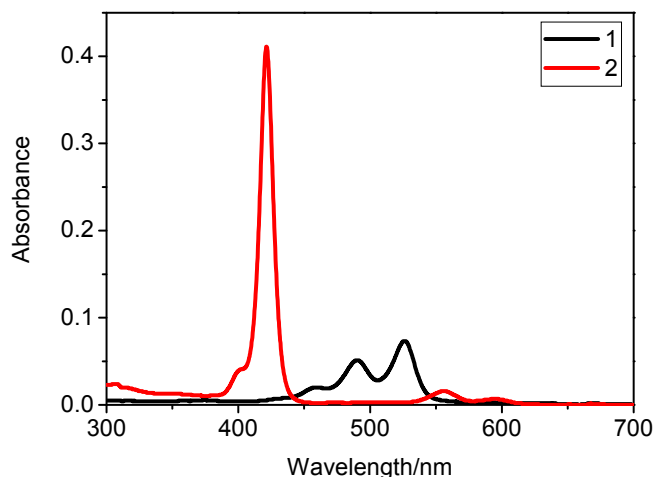

Fig. S1. UV–Vis spectra of **1** ( $1.0 \times 10^{-6}$  M) and **2** ( $1.0 \times 10^{-6}$  M) in phosphate buffer (pH 7.0, 0.05 M) at 25 °C.

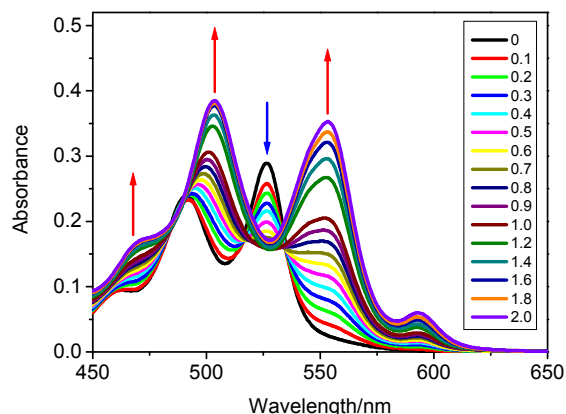

Fig. S2. UV–Vis spectral changes of **1** ( $5.0 \times 10^{-6}$  M) upon addition of **2** (0–2 equiv.) in phosphate buffer (pH 7.0, 0.05 M) at 25 °C.

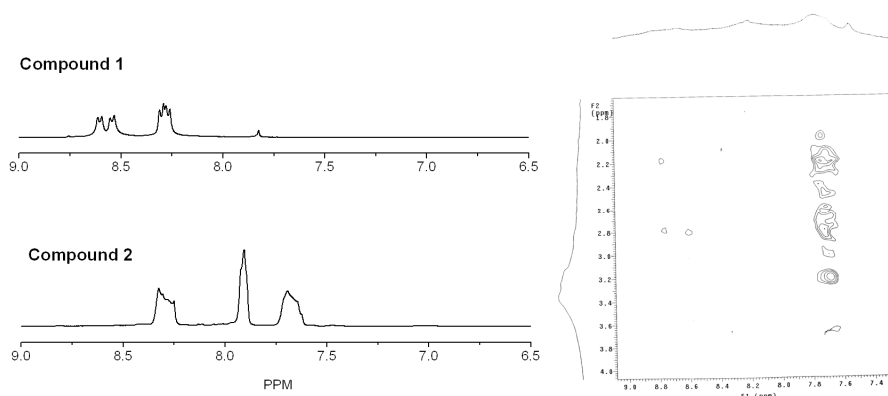

Fig. S3.  $^1\text{H}$  NMR spectra of **1** and **2**, and 2D NOESY spectra of **1** with **2** in  $\text{D}_2\text{O}$  at 25 °C.

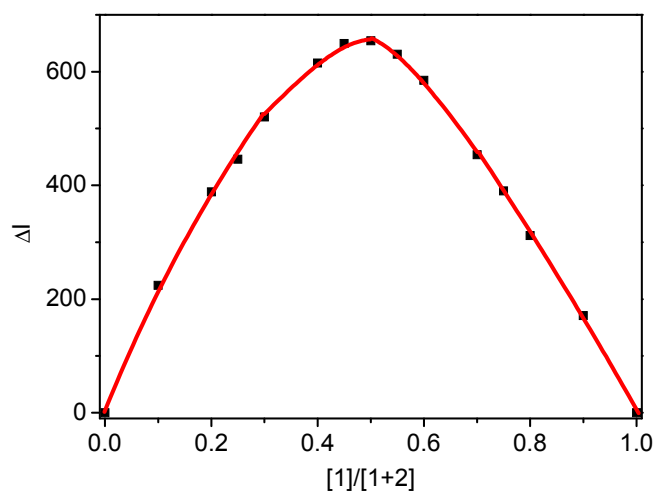

Fig. S4. The Job' plot for **1** upon complexation with **2**, fluorescence changes recorded at 535 nm for **1**, and the sum of the total concentrations of hosts and guests is constant ( $1.0 \times 10^{-6}$  M).

STOPPED

|               |                  |              |            |
|---------------|------------------|--------------|------------|
| First Delay:  | 5.0 $\mu$ sec    | Samples:     | 5.8360e+07 |
| Last Delay:   | 10.0 msec        | Atot:        | 3.5169e+06 |
| Elapsed Time: | 00:07:52         | A CR (avg.): | 12.1 kcps  |
| Wavelength:   | 636.0 nm         | M. Base:     | 2.1395e+05 |
| Angle:        | 90.0             | C. Base:     | 2.1194e+05 |
| Temp:         | 24.2 deg C (GTE) | Base diff:   | 0.948%     |
| Liquid:       | Water            | Dust Cutoff: | 10.00      |
| Viscosity:    | 0.907 cP         | Eff Dia:     | 124.0 nm   |
| Ref Index:    | 1.331            | Poly:        | 0.396      |

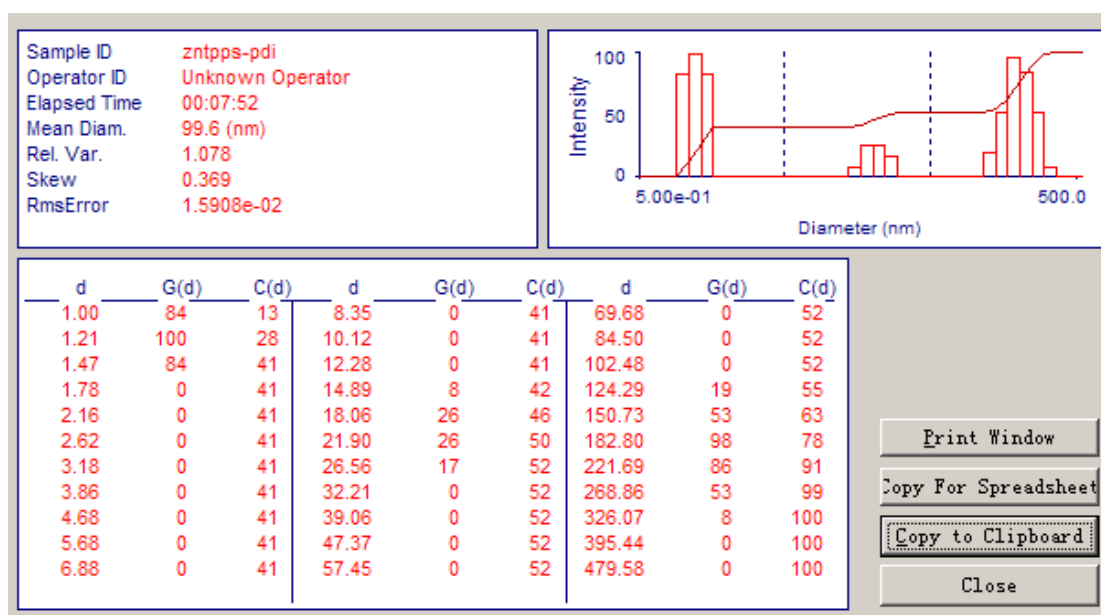

Fig. S5. Size distribution of **1** ( $5.0 \times 10^{-6}$ M) with **2** ( $5.0 \times 10^{-6}$ M) obtained from dynamic light scattering (DLS) in phosphate buffer (pH 7.0, 0.05 M).

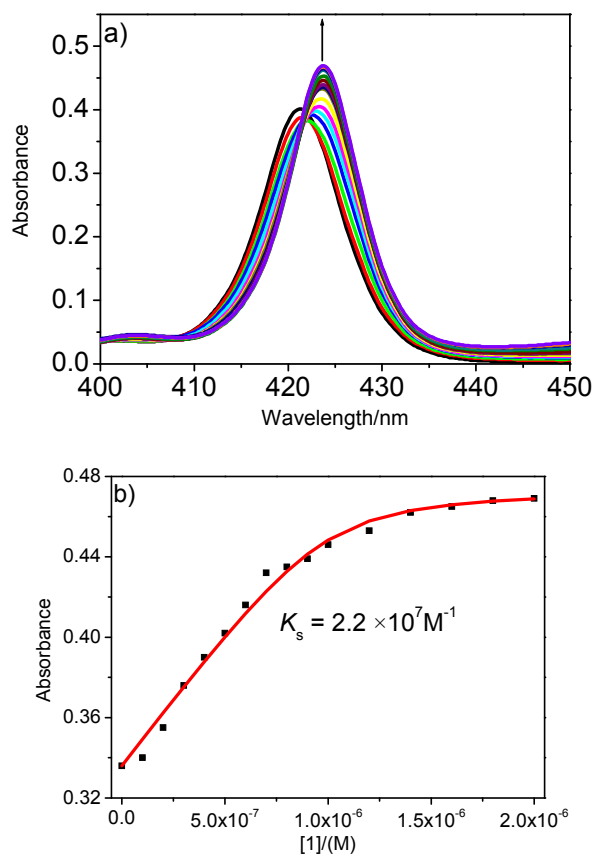

Fig. S6. (a) Soret band spectral changes of **2** ( $1.0 \times 10^{-6}$  M) upon addition of **1** (0–2 equiv.) in phosphate buffer (pH 7.0, 0.05 M) at 25 °C; (b) the curve of the complexation stability constants fitting at the 424 nm.

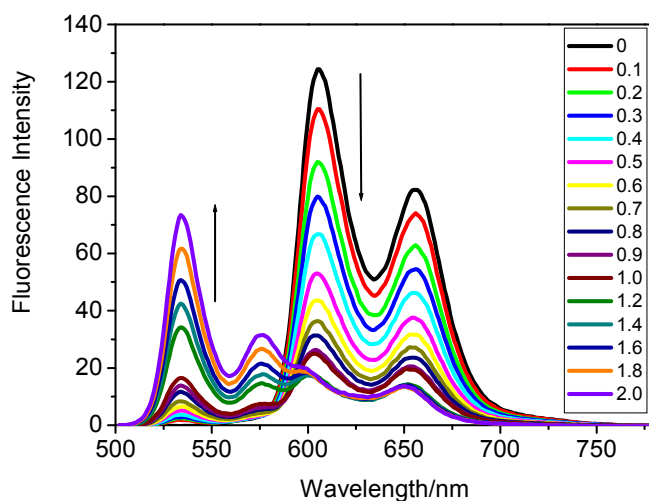

Fig. S7. Fluorescence spectral changes of **2** ( $\lambda_{ex} = 421$  nm,  $1.0 \times 10^{-6}$  M, emission slit width of 5 nm) with addition of **1** (0–2 equiv.) in phosphate buffer (pH = 7.0, 0.05 M) and 25 °C.

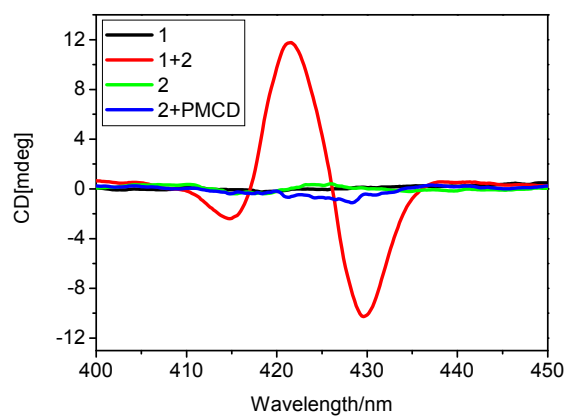

Fig. S8. Circular dichroism spectra of **1** (Black,  $5.0 \times 10^{-6}$  M), **1** (Red,  $5.0 \times 10^{-6}$  M) with addition of 1 equiv. **2**, **2** (Green,  $5.0 \times 10^{-6}$  M), and **2** (Blue,  $5.0 \times 10^{-6}$  M) with addition of 2 equiv. PMCD in phosphate buffer (pH 7.0, 0.05 M).

- 
- 1 Y. Liu, K. R. Wang, D. S. Guo, B. P. Jiang, *Adv. Funct. Mater.*, 2009, **19**, 2230.
  - 2 K. Kano, S. Kobayashi, *Bull. Chem. Soc. Jpn.*, 2003, **76**, 2027.
